# Supplementary material for: Regulating Pd/Al2O3 catalyst by g-C3N4 toward the enhanced selectivity of isoprene hydrogenation
Source: Royal Society of Chemistry journal article supplement (doi:10.1039/d1cy00596k), 2021-01-01
Supplement: d1cy00596k1.pdf [file d1cy00596k1.pdf]

## Supporting Information

# Regulating Pd/Al<sub>2</sub>O<sub>3</sub> catalyst by g-C<sub>3</sub>N<sub>4</sub> toward enhanced selectivity of isoprene hydrogenation

*Xiang Yu<sup>a,b#</sup>, Yuqi Zhang<sup>a#</sup>, Huan Liu<sup>a</sup>, Shunqin Liang<sup>c</sup>, Limin Sun<sup>c</sup>, Xiaoli Hu<sup>c</sup>, Weiping Fang<sup>a</sup>, Zhou Chen<sup>a\*</sup> and Xiaodong Yi<sup>a\*</sup>*

<sup>a</sup> College of Materials, College of Chemistry and Chemical Engineering, Xiamen University, Xiamen 361005, P. R. China.

<sup>b</sup> Inorganic Chemistry and Catalysis Group, Debye Institute for Nanomaterials Science, Utrecht University, Utrecht, The Netherlands.

<sup>c</sup> Petro China Lanzhou Petrochemical Research Center, Gansu Lanzhou 730000, China.

# These authors equally contributed to the paper.

\* Corresponding author:

zhouchen@xmu.edu.cn (Zhou Chen),

[xdyi@xmu.edu.cn](mailto:xdyi@xmu.edu.cn) (Xiaodong Yi)

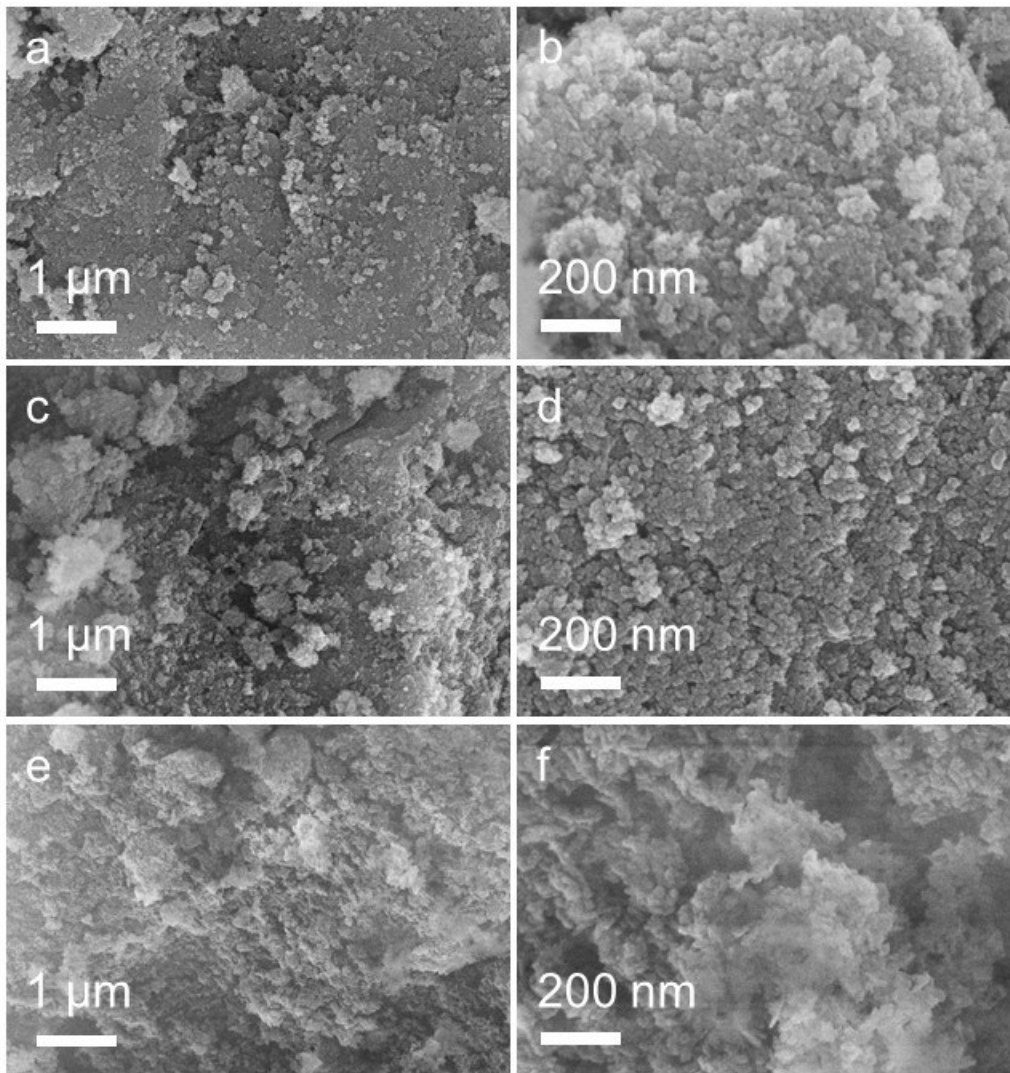

**Figure S1.** SEM images of (a, b)  $\text{Al}_2\text{O}_3$ , (c, d) RMS and (e, f) FZC (All of the supports were calcined at 800 °C).

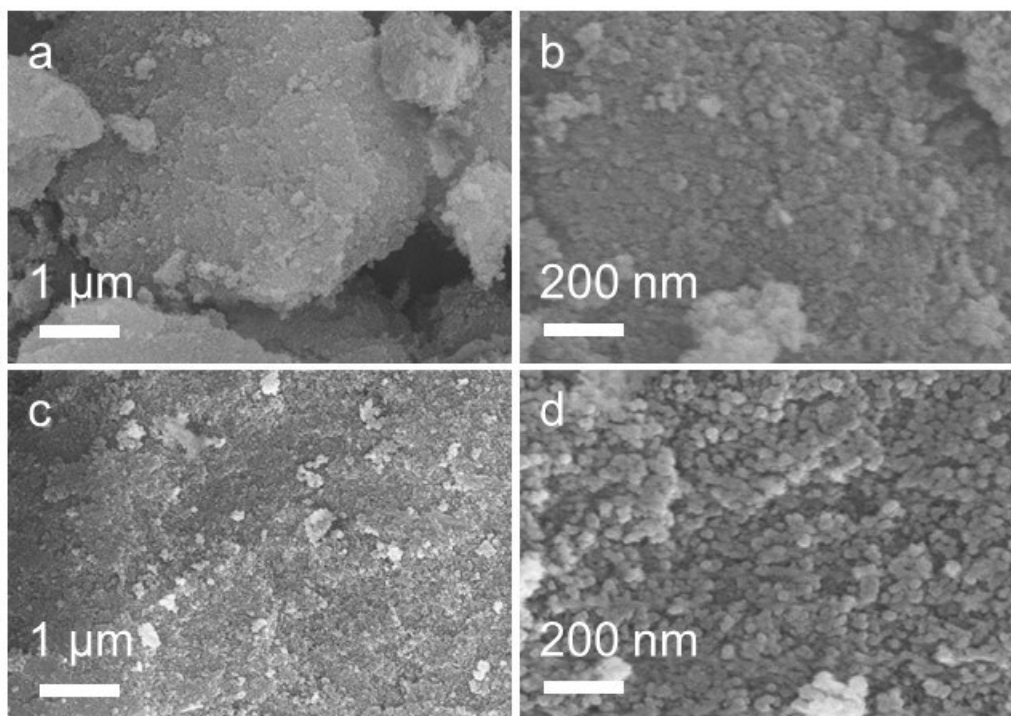

**Figure S2.** SEM images of (a, b) Pd/Al<sub>2</sub>O<sub>3</sub> and (c, d) Pd/Al<sub>2</sub>O<sub>3</sub>-U7.

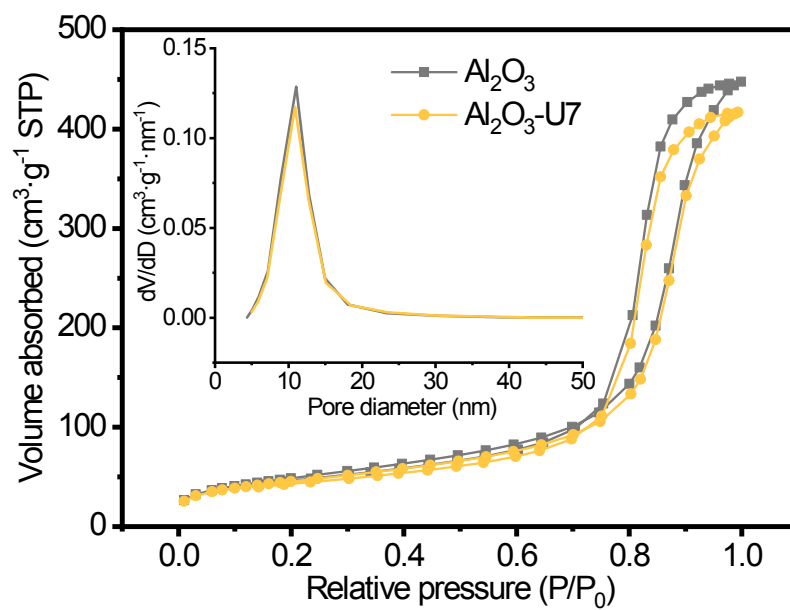

**Figure S3.**  $\text{N}_2$  adsorption-desorption isotherms and pore-size distribution curves (insets) of  $\text{Al}_2\text{O}_3$  and  $\text{Al}_2\text{O}_3\text{-U7}$ .

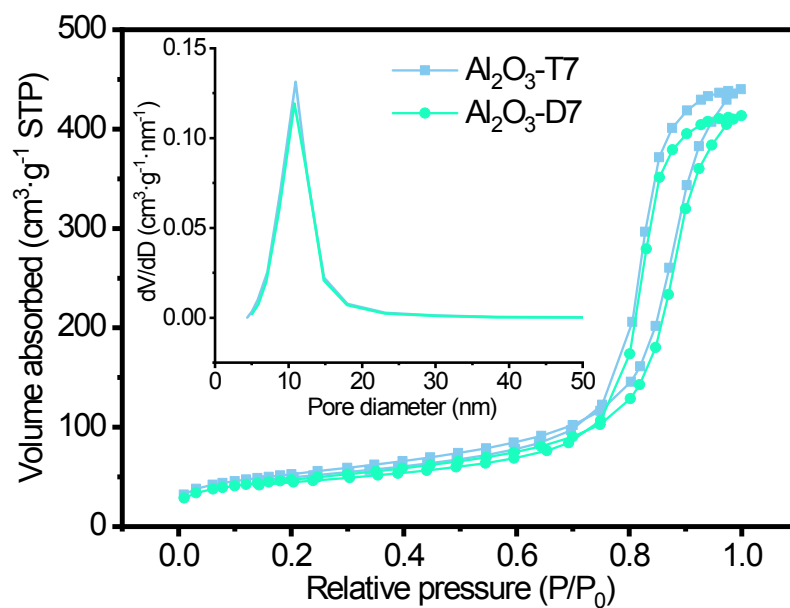

**Figure S4.**  $\text{N}_2$  adsorption-desorption isotherms and pore-size distribution curves (insets) of  $\text{Al}_2\text{O}_3$ -T7 and  $\text{Al}_2\text{O}_3$ -D7.

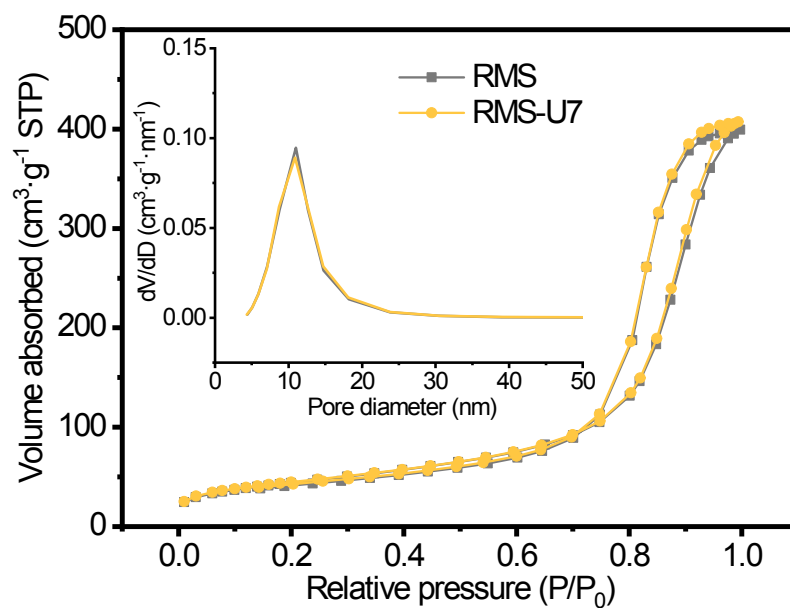

**Figure S5.**  $\text{N}_2$  adsorption-desorption isotherms and pore-size distribution curves (insets) of RMS and RMS-U7.

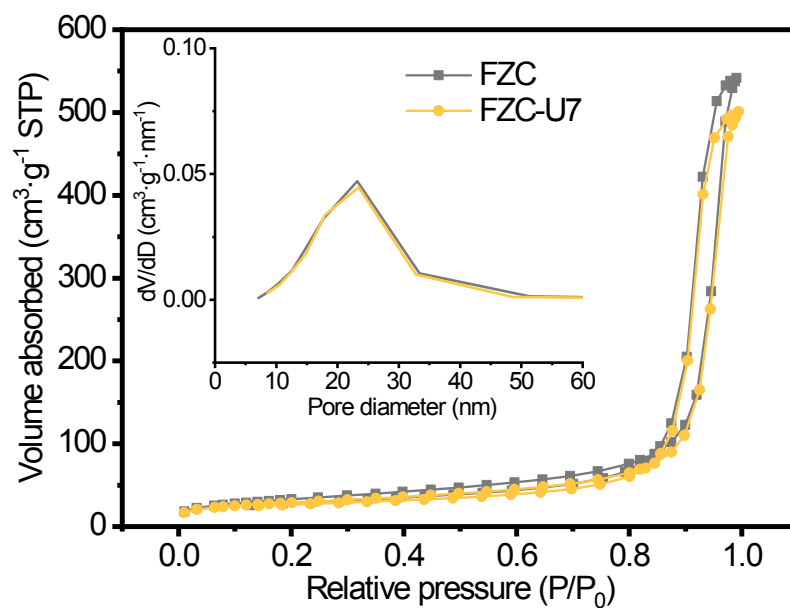

**Figure S6.** N<sub>2</sub> adsorption-desorption isotherms and pore-size distribution curves (insets) of FZC and FZC-U7.

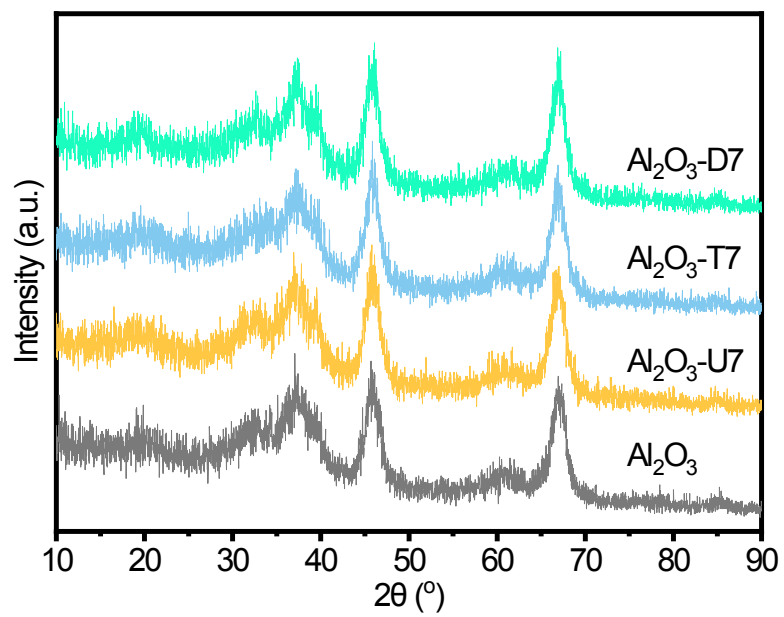

**Figure S7.** The XRD patterns of  $\text{Al}_2\text{O}_3$ ,  $\text{Al}_2\text{O}_3$ -U7,  $\text{Al}_2\text{O}_3$ -T7 and  $\text{Al}_2\text{O}_3$ -D7.



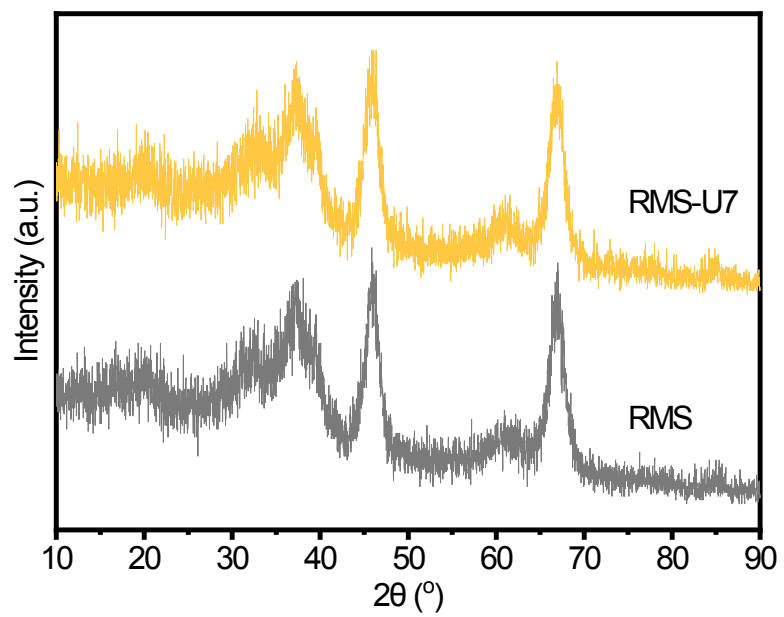

**Figure S8.** The XRD patterns of RMS and RMS-U7.

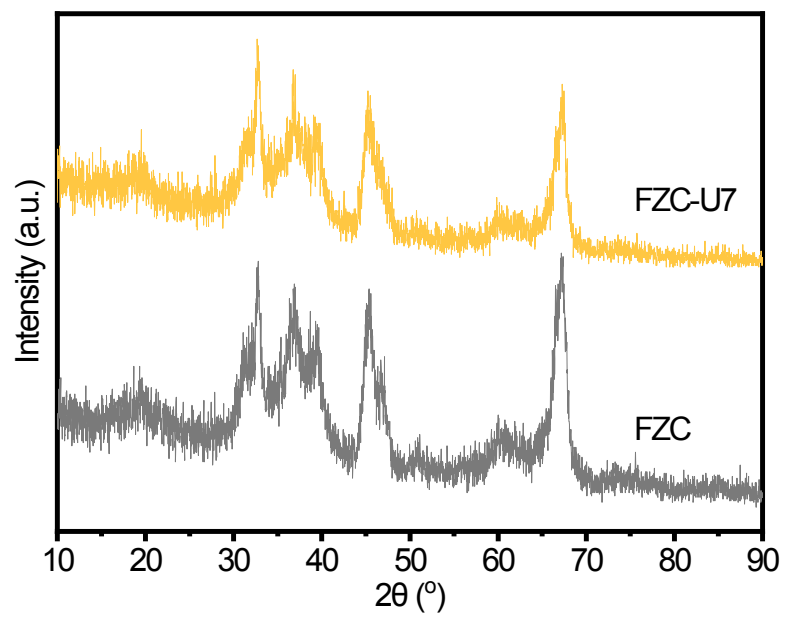

**Figure S9.** The XRD patterns of FZC and FZC-U7.

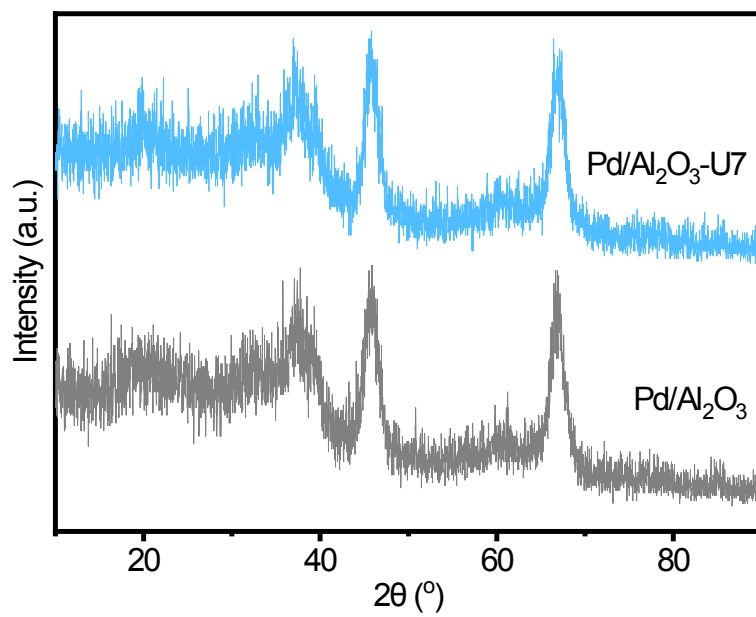

**Figure S10.** The XRD patterns of Pd/Al<sub>2</sub>O<sub>3</sub> and Pd/Al<sub>2</sub>O<sub>3</sub>-U7.

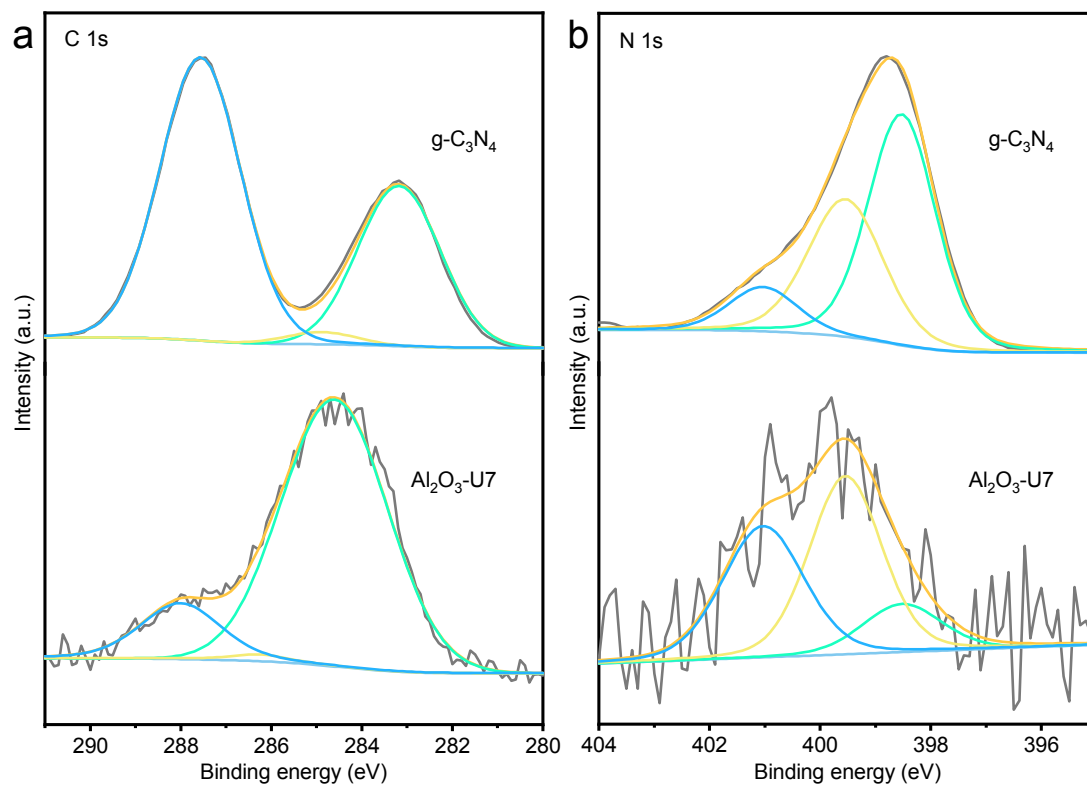

**Figure S11.** The XPS spectra of (a) C 1s and (b) N 1s of the g-C<sub>3</sub>N<sub>4</sub> (prepared by pyrolysis of urea) and Al<sub>2</sub>O<sub>3</sub>-U7.

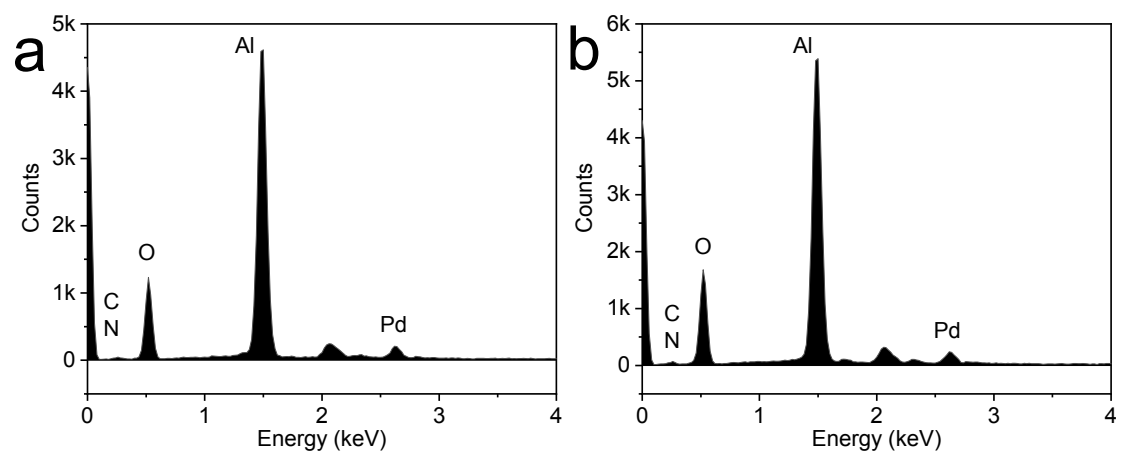

**Figure S12.** The EDS patterns of (a) Pd/Al<sub>2</sub>O<sub>3</sub> and (b) Pd/Al<sub>2</sub>O<sub>3</sub>-U7.

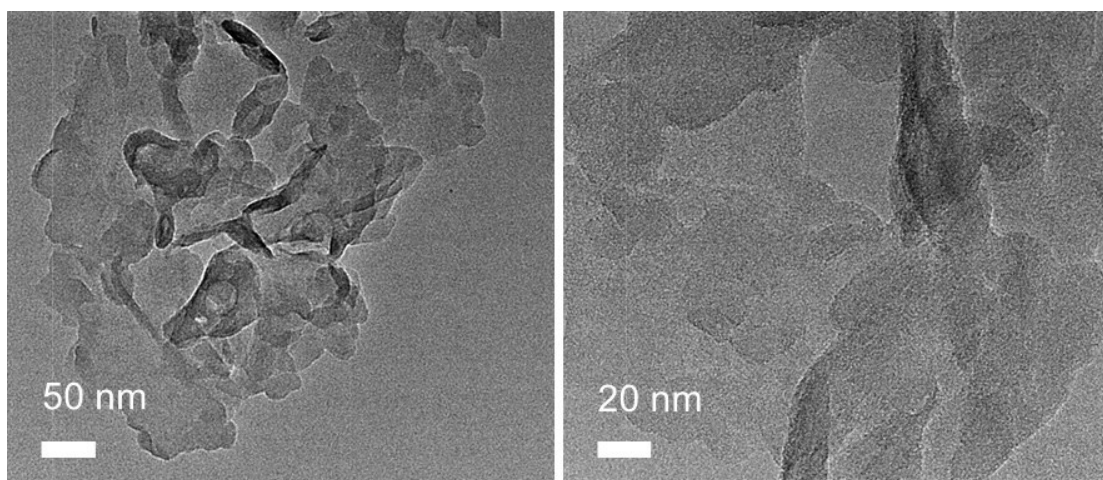

**Figure S13.** The HRTEM images of g-C<sub>3</sub>N<sub>4</sub>.

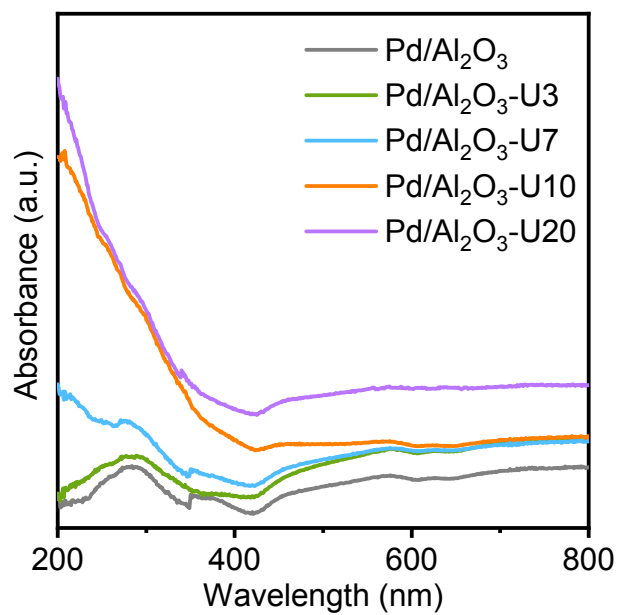

**Figure S14.** The UV-vis DRS spectra of Pd/Al<sub>2</sub>O<sub>3</sub>, Pd/Al<sub>2</sub>O<sub>3</sub>-U3, Pd/Al<sub>2</sub>O<sub>3</sub>-U7, Pd/Al<sub>2</sub>O<sub>3</sub>-U10 and Pd/Al<sub>2</sub>O<sub>3</sub>-U20.

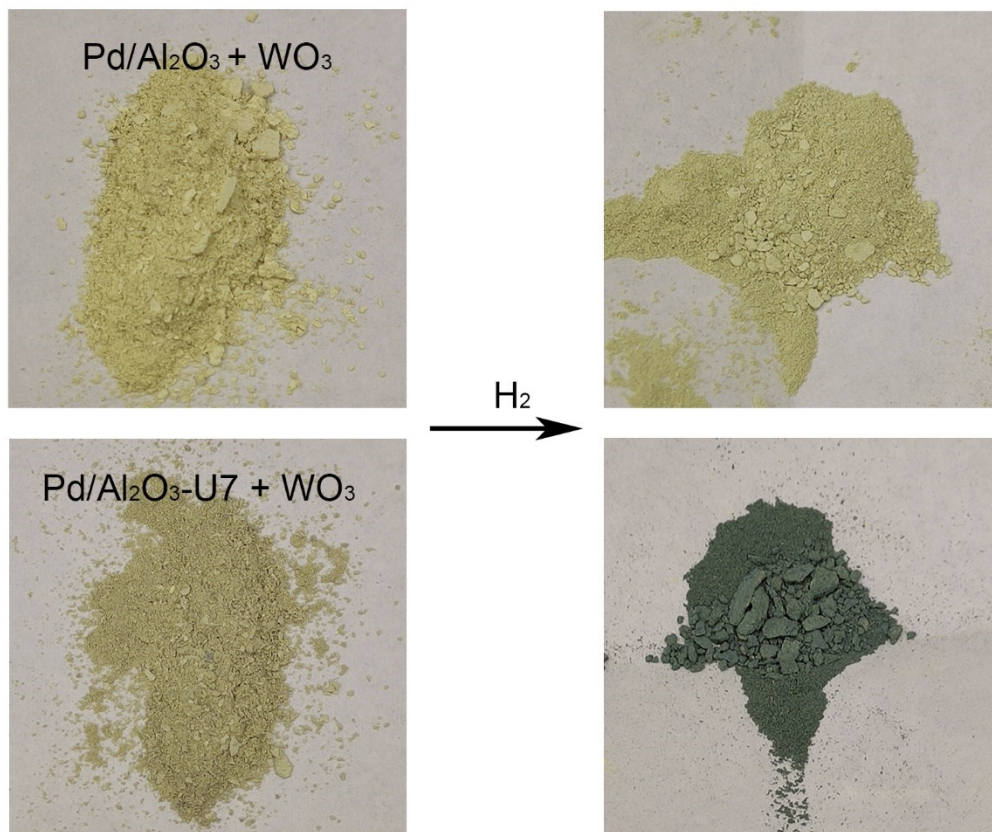

**Figure S15.** The digital images of  $Pd/Al_2O_3+WO_3$  and  $Pd/Al_2O_3-U7+WO_3$  before (left) and after (right) hydrogen treatments.



**Table S1.** Texture properties of the alumina supports.

| Supports                           | BET Surface Area<br>(m <sup>2</sup> g <sup>-1</sup> ) | Pore Volume<br>(cm <sup>3</sup> g <sup>-1</sup> ) | Pore Size<br>(nm) |
|------------------------------------|-------------------------------------------------------|---------------------------------------------------|-------------------|
| Al <sub>2</sub> O <sub>3</sub>     | 177                                                   | 0.69                                              | 10.9              |
| Al <sub>2</sub> O <sub>3</sub> -U7 | 164                                                   | 0.65                                              | 11.0              |
| Al <sub>2</sub> O <sub>3</sub> -T7 | 188                                                   | 0.68                                              | 10.9              |
| Al <sub>2</sub> O <sub>3</sub> -D7 | 168                                                   | 0.64                                              | 11.0              |
| RMS                                | 160                                                   | 0.62                                              | 10.9              |
| RMS-U7                             | 162                                                   | 0.63                                              | 11.1              |
| FZC                                | 119                                                   | 0.84                                              | 22.1              |
| FZC-U7                             | 104                                                   | 0.78                                              | 22.0              |

**Table S2.** The Pd content of Pd/Al<sub>2</sub>O<sub>3</sub> and Pd/Al<sub>2</sub>O<sub>3</sub>-U7 determined by ICP-OES.

| Samples                               | Content of Pd (%) |
|---------------------------------------|-------------------|
| Pd/Al <sub>2</sub> O <sub>3</sub>     | 0.16              |
| Pd/Al <sub>2</sub> O <sub>3</sub> -U7 | 0.16              |

**Table S3.** The deconvolution results of C 1s and N 1s XPS spectra of Pd/Al<sub>2</sub>O<sub>3</sub> and Pd/Al<sub>2</sub>O<sub>3</sub>-U7.

| Samples                               | Atomic percentage (%)          |                                    |                   |                                  |
|---------------------------------------|--------------------------------|------------------------------------|-------------------|----------------------------------|
|                                       | sp <sup>2</sup> -bonded carbon | sp <sup>2</sup> -bonded aromatic N | tertiary N groups | quaternary N bonded three carbon |
| Pd/Al <sub>2</sub> O <sub>3</sub>     | -                              | -                                  | -                 | -                                |
| Pd/Al <sub>2</sub> O <sub>3</sub> -U7 | 0.17                           | 0.09                               | 0.51              | 0.40                             |

**Table S4.** EDS elemental analysis of Pd/Al<sub>2</sub>O<sub>3</sub> and Pd/Al<sub>2</sub>O<sub>3</sub>-U7.

| Samples                               | Atomic percentage (%) |      |       |       |      |
|---------------------------------------|-----------------------|------|-------|-------|------|
|                                       | C                     | N    | O     | Al    | Pd   |
| Pd/Al <sub>2</sub> O <sub>3</sub>     | 5.23                  | 1.95 | 51.95 | 40.64 | 0.24 |
| Pd/Al <sub>2</sub> O <sub>3</sub> -U7 | 9.51                  | 2.27 | 52.83 | 35.16 | 0.24 |
